# Supplementary material for: Impact of Toll-Like Receptor-Specific Agonists on the Host Immune Response to the Yersinia pestis Plague rF1V Vaccine
Source: PubMed Central journal article supplement (PMC8430260; doi:10.3389/fimmu.2021.726416), 2021-08-27
Supplement: Presentation_1.pdf [file Presentation_1.pdf]

Table S1:

| Toll-like receptor (TLR) Agonist |                                                            |                      |                                            |
|----------------------------------|------------------------------------------------------------|----------------------|--------------------------------------------|
| Name                             | Synthetic Ligand                                           | Receptor             | Physiological Ligand                       |
| Pam3CSK4                         | triacylated lipopeptide                                    | TLR 2                | cell-wall components, such as lipoproteins |
| Poly(IC)LC                       | double-stranded<br>polyriboinosinic-polyribocytidylic acid | TLR 3                | double-stranded RNA                        |
| MPLA                             | Monophosphoryl Lipid A                                     | TLR 4                | lipopolysaccharide                         |
| Imiquimod                        | imidazoquinoline amine analog to guanosine                 | TLR 7                | ssRNA and oligoribonucleotides             |
| Resiquimod (R848)                | imidazoquinoline amine analog to guanosine                 | TLR 7/8 <sup>a</sup> | ssRNA and oligoribonucleotides             |
| CpG2006                          | class B CpG oligonucleotide                                | TLR 9                | unmethylated CpG dinucleotides             |

<sup>a</sup> In mice, TLR8 appears to recognize different ligands relative to the human counterpart. In humans, Resiquimod activates both TLR7 and TLR8 but it only activates TLR7 in mice.

Table S2: The LD<sub>50</sub> of *Y. pestis* CO92 and C12 in BALB/c and CD1 mice exposed via whole body aerosol or subcutaneous challenge.

| Mouse strain | Route of exposure | Bacterial strain      | LD <sub>50</sub> (CFU) <sup>a</sup> | Confidence intervals (CFU) <sup>a</sup>   |
|--------------|-------------------|-----------------------|-------------------------------------|-------------------------------------------|
| BALB/c       | Aerosol           | <i>Y. pestis</i> CO92 | 6.8x10 <sup>4</sup> <sup>b</sup>    | ND <sup>b</sup>                           |
| BALB/c       | Aerosol           | <i>Y. pestis</i> C12  | 7.7x10 <sup>4</sup>                 | ND <sup>c</sup>                           |
| BALB/c       | Subcutaneous      | <i>Y. pestis</i> CO92 | 1.6                                 | 0.62 - 4.1                                |
| BALB/c       | Subcutaneous      | <i>Y. pestis</i> C12  | 9.01                                | 2.2 - 36.6                                |
| CD-1         | Aerosol           | <i>Y. pestis</i> CO92 | 3.4x10 <sup>4</sup>                 | 2.4x10 <sup>4</sup> - 4.8x10 <sup>4</sup> |
| CD-1         | Aerosol           | <i>Y. pestis</i> C12  | 4.1x10 <sup>4</sup>                 | 3.2x10 <sup>4</sup> - 5.2x10 <sup>4</sup> |
| CD-1         | Subcutaneous      | <i>Y. pestis</i> CO92 | 52.4                                | 7.1 - 3.9x10 <sup>2</sup>                 |
| CD-1         | Subcutaneous      | <i>Y. pestis</i> C12  | 9.4x10 <sup>2</sup>                 | 8.7x10 <sup>1</sup> - 1.0x10 <sup>4</sup> |

<sup>a</sup> colony-forming unit

<sup>b</sup> Source: Heine, H.S., et al., Comparison of 2 antibiotics that inhibit protein synthesis for the treatment of infection with *Yersinia pestis* delivered by aerosol in a mouse model of pneumonic plague. *The Journal of infectious diseases*, 2007. 196(5): p. 782-787.

<sup>c</sup> The confidence interval was unbounded.

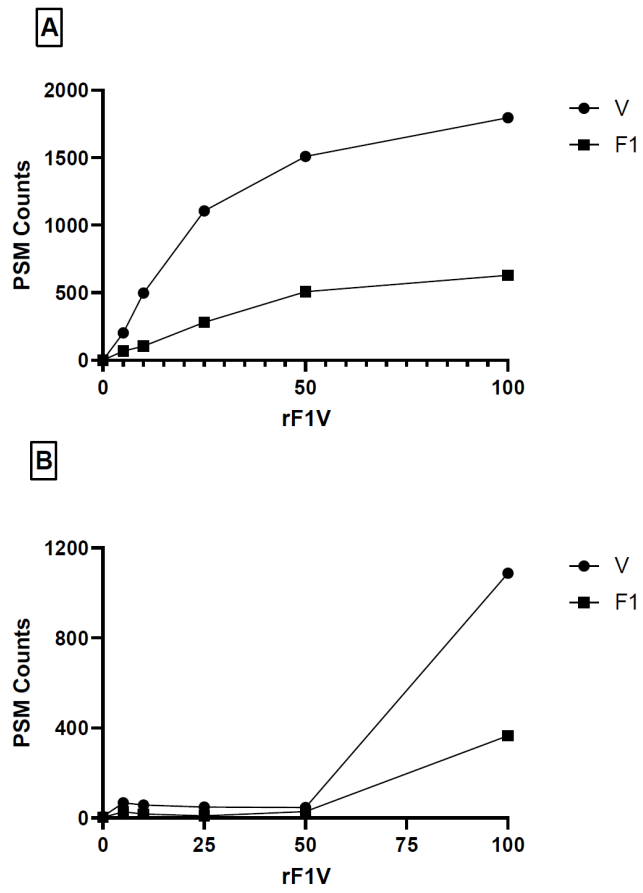

Figure S1. LC-MS/MS quantitation of V and F1 antigens using PSM and relative quantitation. (A) In the absence of alhydrogel and (B) in the presence of alhydrogel.

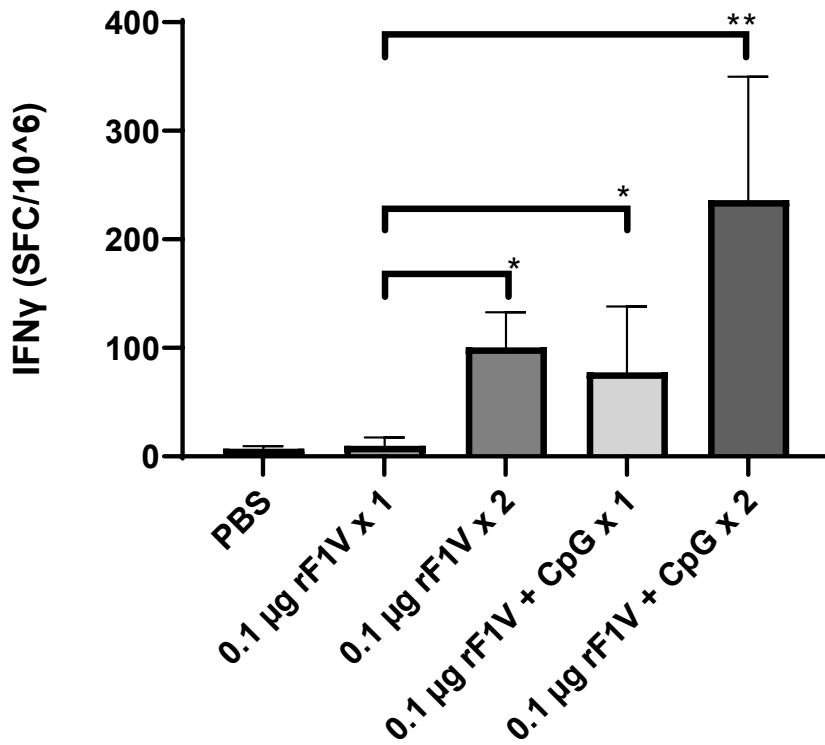

Figure S2. Double dose of rF1V with CpG enhanced recall response. Enumeration of IFN- $\gamma$  response in secreting spleen cells stimulated by rF1V in the ELISpot assay. BALB/c mice (n=5 for all groups with the exception of 0.1  $\mu$ g rF1V x 1 group which was n=4) were vaccinated, with either one (x 1) or two (x 2) doses that were 3 weeks apart, as described previously. Splenocytes were stimulated in the presence rF1V (25  $\mu$ g/ml) for 24 hours at 37°C. The number of discrete IFN- $\gamma$  secreting cells on the membrane were measured as spot-forming cells (SFC) per 10<sup>6</sup> cells. Data are presented as geometric mean of number of spots per well. p-values reflect the result of post-hoc comparisons under a repeated measures ANOVA model. Comparison between groups is made by Welch's t-test. \*p<0.05, \*\*p<0.005 (Comparisons show significant differences versus the 0.1  $\mu$ g rF1V x 1 group)

Table S3: CpG saturation of 100 µg Alhydrogel.

| Sample no.         | Amount DPBS | Amount CpG2006<br>or MPLA | Amount<br>Alhydrogel | Concentration<br>(µg/ml) <sup>a</sup> |
|--------------------|-------------|---------------------------|----------------------|---------------------------------------|
| Order of addition: | (1)         | (2)                       | (3)                  |                                       |
| 1                  | 1000 µl     | 0                         | 0                    | <b>-0.1</b>                           |
| 2                  | 980 µl      | 5.0 µg (20 µl)            | 0                    | <b>3.5</b>                            |
| 3                  | 960 µl      | 10 µg (40 µl)             | 0                    | <b>7.3</b>                            |
| 4                  | 900 µl      | 25 µg (100 µl)            | 0                    | <b>21.2</b>                           |
| 5                  | 800 µl      | 50 µg (200 µl)            | 0                    | <b>49.9</b>                           |
| 6                  | 600 µl      | 100 µg (400 µl)           | 0                    | <b>98.3</b>                           |
| 7                  | 950 µl      | 0                         | 100 µg (50 µl)       | <b>-0.2</b>                           |
| 8                  | 930 µl      | 5.0 µg (20 µl)            | 100 µg (50 µl)       | <b>-0.1</b>                           |
| 9                  | 910 µl      | 10 µg (40 µl)             | 100 µg (50 µl)       | <b>0</b>                              |
| 10                 | 850 µl      | 25 µg (100 µl)            | 100 µg (50 µl)       | <b>7.9</b>                            |
| 11                 | 750 µl      | 50 µg (200 µl)            | 100 µg (50 µl)       | <b>32.1</b>                           |
| 12                 | 550 µl      | 100 µg (400 µl)           | 100 µg (50 µl)       | <b>82.9</b>                           |

<sup>a</sup>Known quantities of the CpG2006 (5-100 µg) were added to 100 µg of Alhydrogel in a total volume of 1ml DPBS and incubated for 60 min at 4°C under rotational mixing. After the incubation the samples were centrifuged at 10,000 rpm (9,300 xg) for 10 min at 4°C and the supernatant was removed and placed in low protein binding tubes on ice. Concentration of free CpG2006 was determined by NanoDrop One UV-spectrum.
